# Supplementary material for: Coupling of cerium oxide cyanamide with Fe–N–C for enhanced oxygen reduction reaction
Source: Royal Society of Chemistry journal article supplement (doi:10.1039/d2nj06359j), 2023-01-01
Supplement: d2nj06359j1.pdf [file d2nj06359j1.pdf]

## Supporting Information

### Coupling of Cerium Oxide Cyanamide with Fe-N-C for Enhanced Oxygen Reduction Reaction

Xu Zhang<sup>abc</sup>, Jingxian Zhang<sup>bc</sup>, Shi Zeng<sup>bc</sup>, Haifan Wang<sup>bc</sup>, Yiling Bai<sup>de</sup>, Huaming Hou<sup>de</sup>, Ke Zhang<sup>f</sup>, Bin Li<sup>f\*</sup>, and Guangjin Zhang<sup>bc\*</sup>

<sup>a</sup> College of Chemical Engineering, Shenyang University of Chemical Technology, Shenyang 110142, China

<sup>b</sup> Center of Materials Science and Optoelectronics Engineering, University of Chinese Academy of Sciences, Beijing 100049, China

<sup>c</sup> CAS Key Laboratory of Green Process and Engineering, Institute of Process Engineering, Chinese Academy of Sciences, 100190, Beijing, China

<sup>d</sup> State Key Laboratory of Coal Conversion, Institute of Coal Chemistry, Chinese Academy of Sciences, Taiyuan 030001, China

<sup>e</sup> National Energy Center for Coal to Liquids, Synfuels China Technology Co., Ltd, Beijing 101400, PR China

<sup>f</sup> Zhengzhou Tobacco Research Institute of CNTC, Zhengzhou 450001, China

## Supporting Figures and Tables

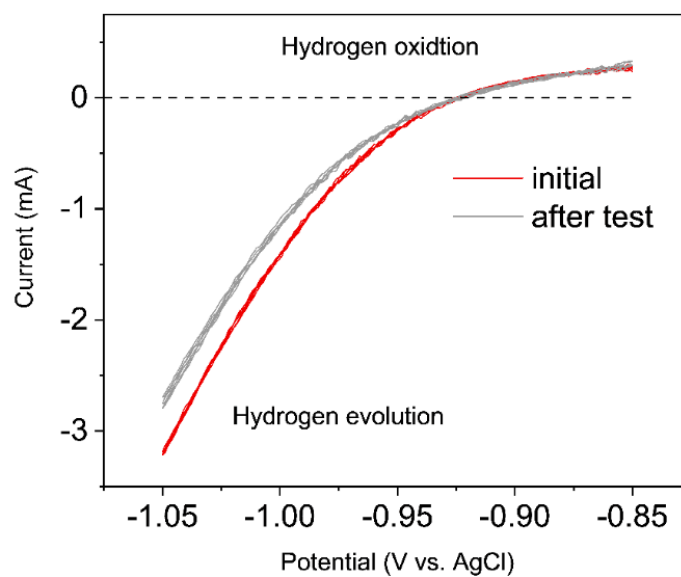

**Fig. S1.** Reversible hydrogen electrode (RHE) calibration results in 0.1 M KOH solution at a scan rate of  $1 \text{ mV s}^{-1}$ .

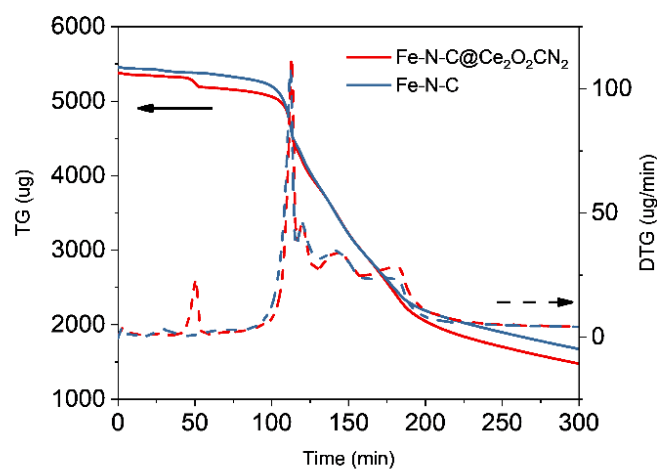

**Fig. S2.** TG analysis of the Fe-ZIF-8@Ce<sub>2</sub>O<sub>2</sub>CN<sub>2</sub> and Fe-ZIF-8.

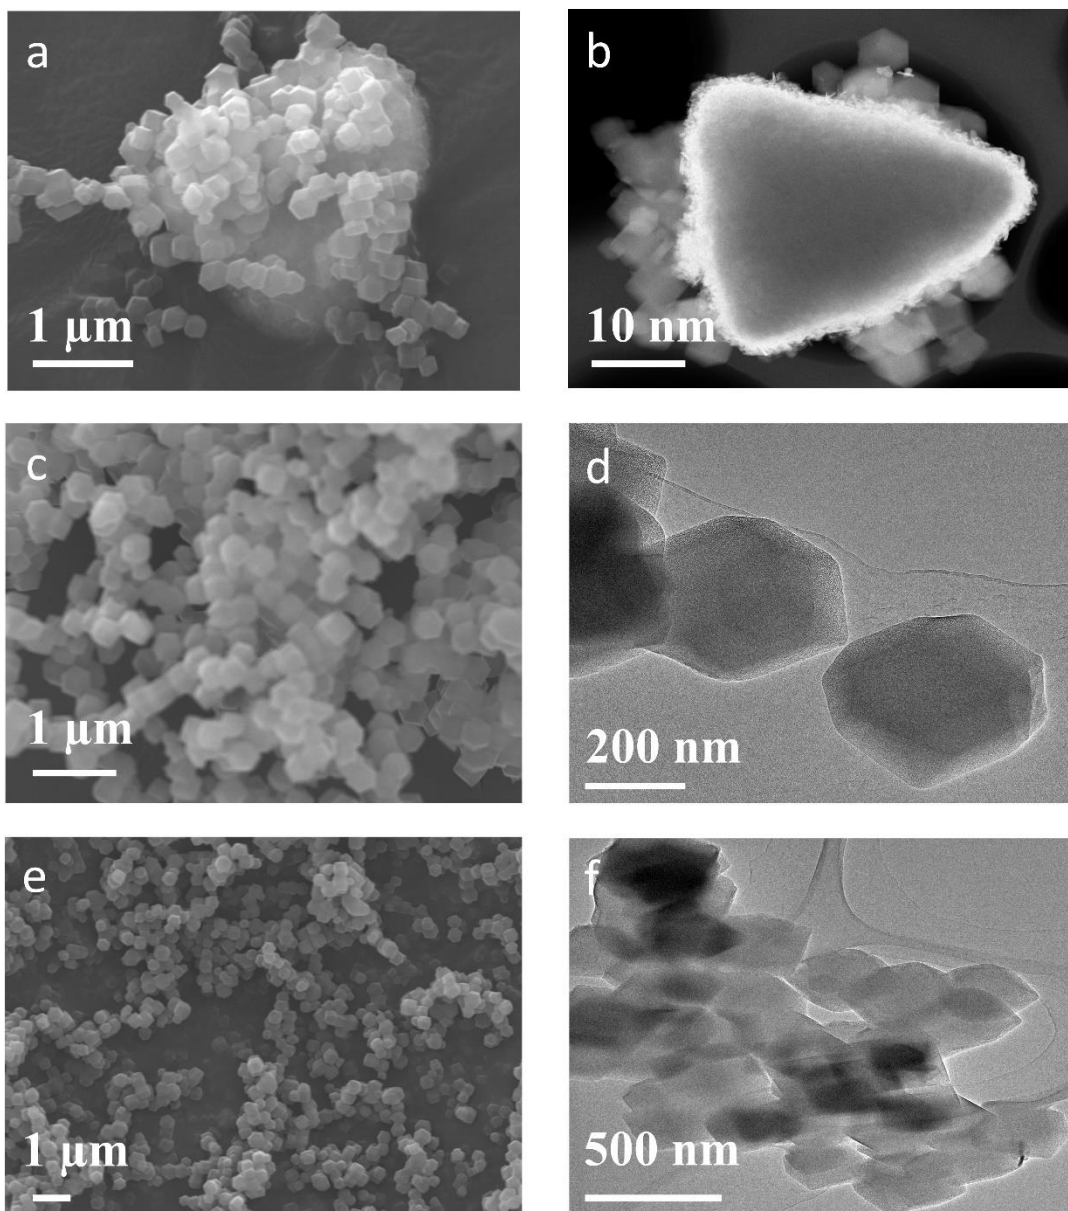

**Fig. S3.** SEM and TEM images of (a,b) N-C@Ce<sub>2</sub>O<sub>2</sub>CN<sub>2</sub>, (c,d) Fe-N-C, and (e,f) N-C.

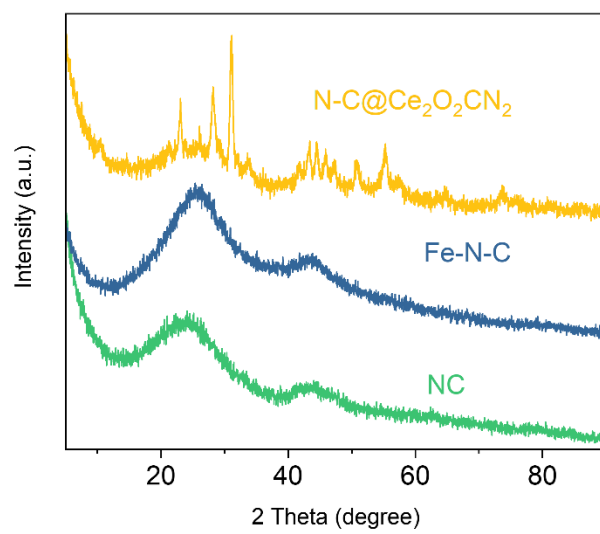

**Fig. S4.** PXRD patterns of N-C@Ce<sub>2</sub>O<sub>2</sub>CN<sub>2</sub>, Fe-N-C, and N-C.

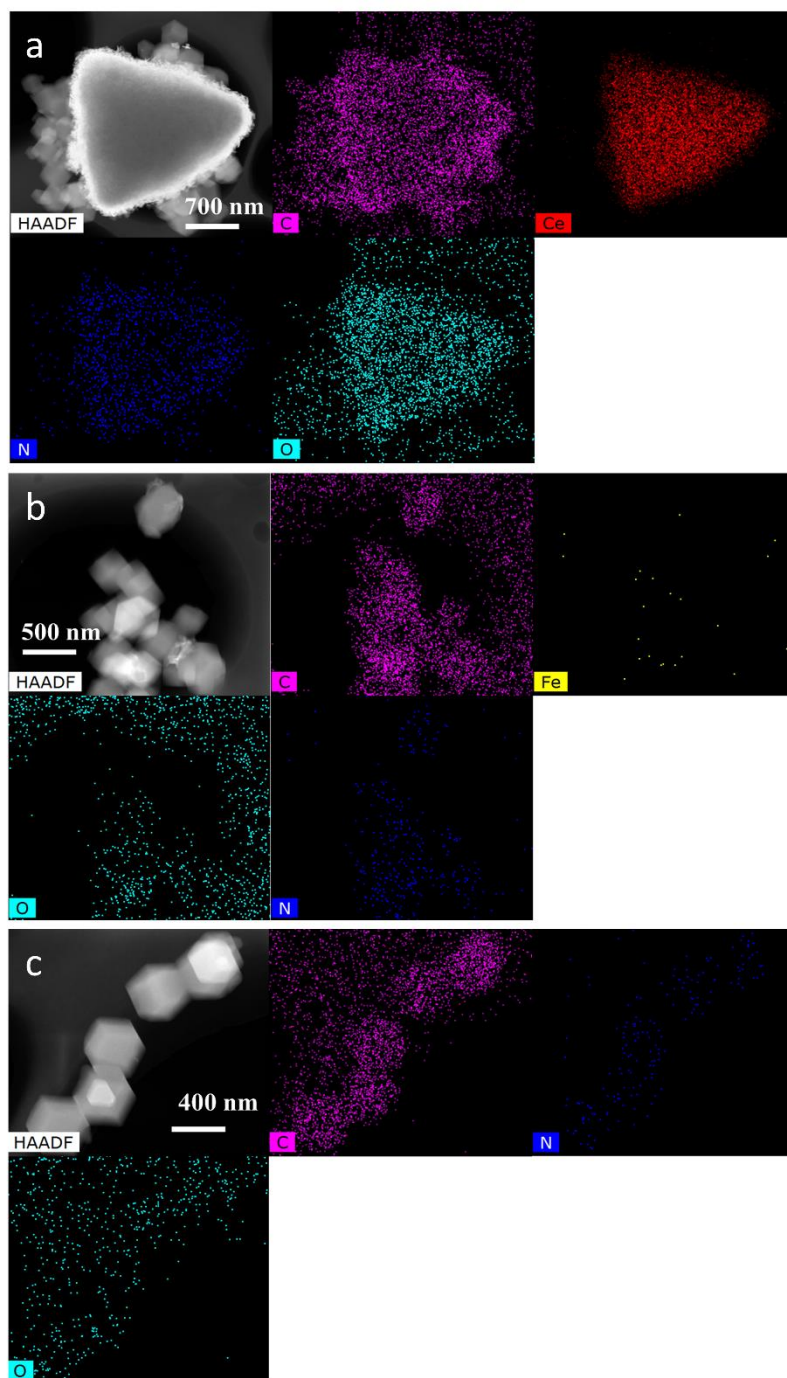

**Fig. S5.** HADF-STEM images and corresponding EDS elemental mappings of (a) N-C@Ce<sub>2</sub>O<sub>2</sub>CN<sub>2</sub>, (b) Fe-N-C, and (c) N-C.

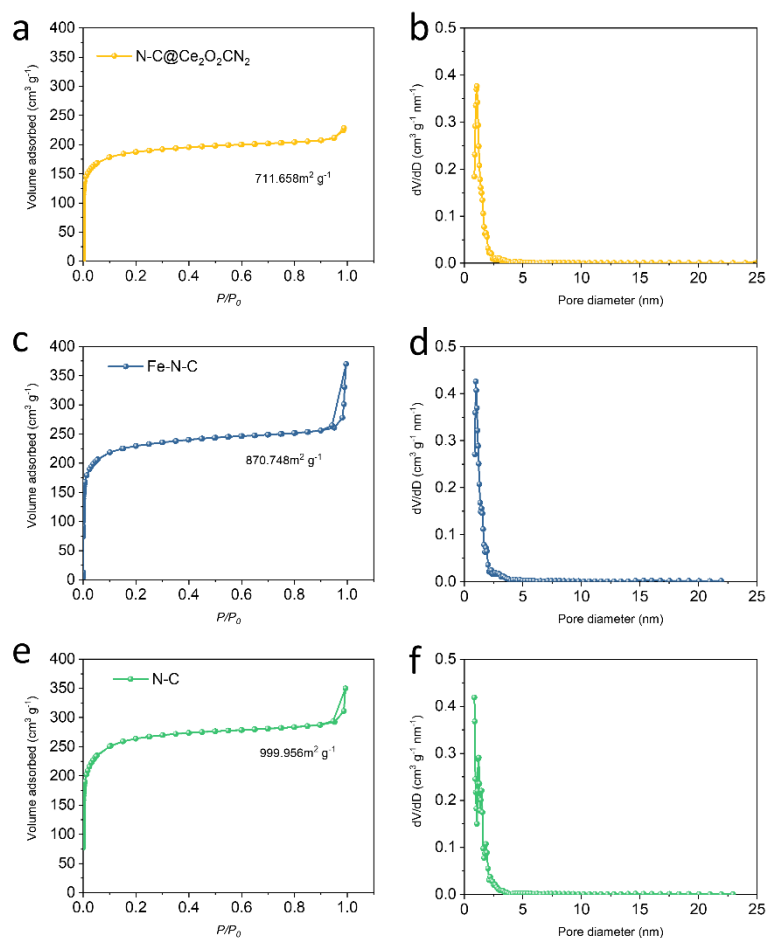

**Fig. S6.** N<sub>2</sub> adsorption-desorption isotherms and pore size distributions of (a,b) N-C@Ce<sub>2</sub>O<sub>2</sub>CN<sub>2</sub>, (c,d) Fe-N-C, and (e,f) N-C.

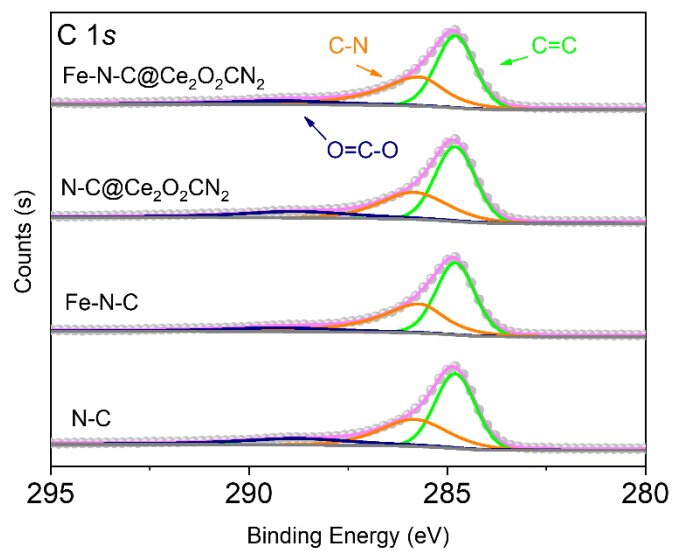

**Fig. S7.** High resolution XPS spectra for C 1s in all samples.

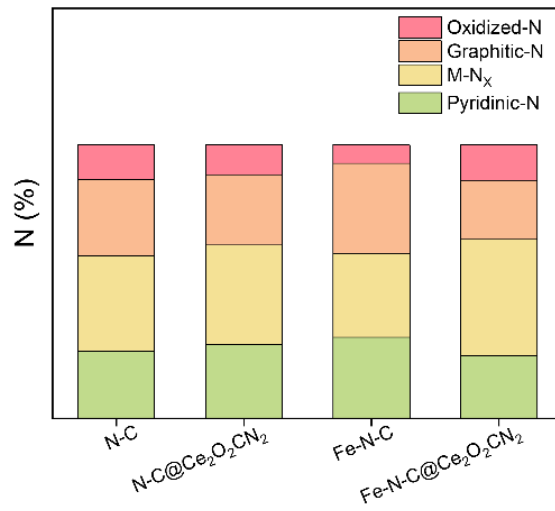

**Fig. S8.** The atomic percentage of pyridinic-N, M-N<sub>x</sub>, graphitic-N, and oxidized-N of obtained catalysts.

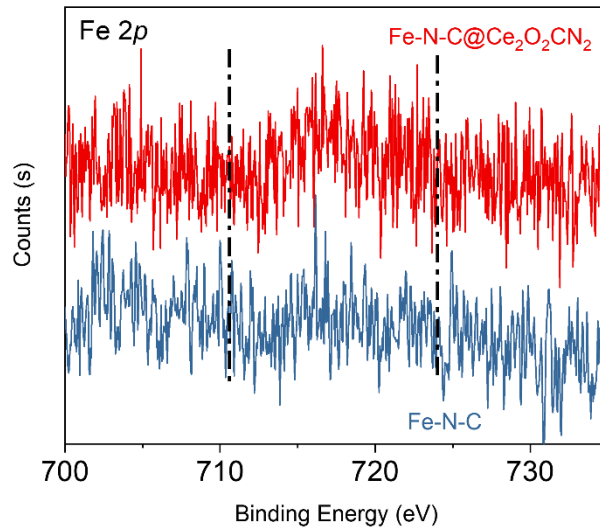

**Fig. S9.** High resolution XPS spectra for Fe 2p in Fe-N-C@Ce<sub>2</sub>O<sub>2</sub>CN<sub>2</sub> and Fe-N-C.

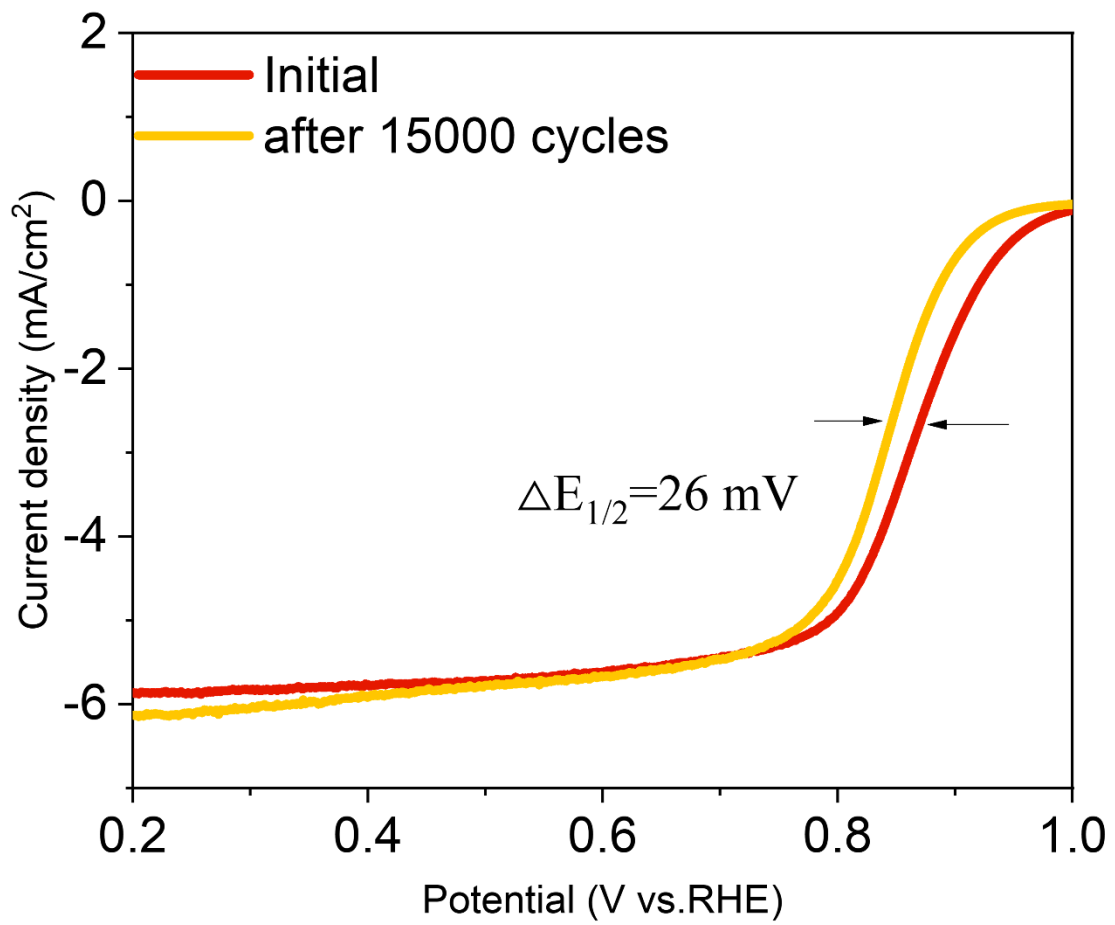

**Fig. S10.** RDE polarization curves of Pt/C before and after 15000 cycles ranging from 0.6 to 1.1 V at 500 mV/s in O<sub>2</sub>-saturated 0.1 M KOH.



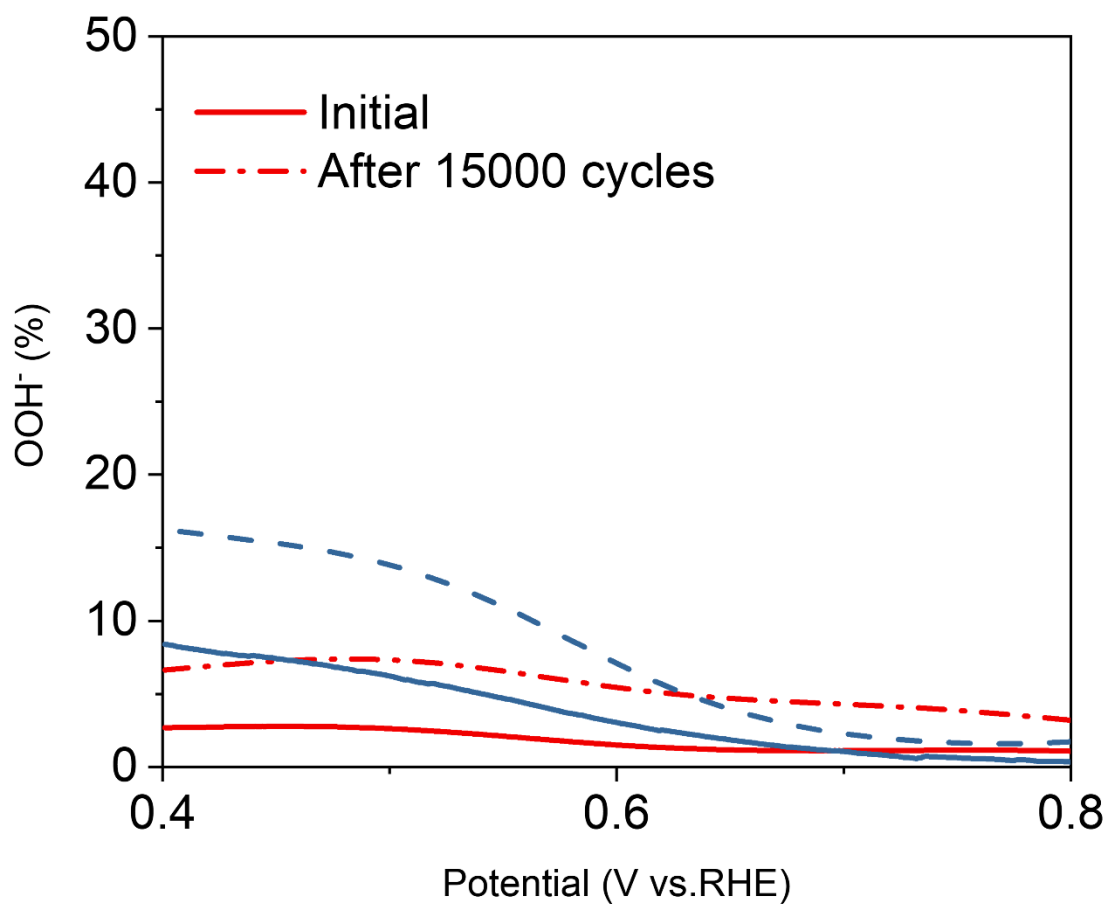

**Fig. S11.**  $\text{OOH}^-$  yields of Fe-N-C@Ce<sub>2</sub>O<sub>2</sub>CN<sub>2</sub> (red) and Fe-N-C (blue) before and after 15000 cycles accelerated durability tests.

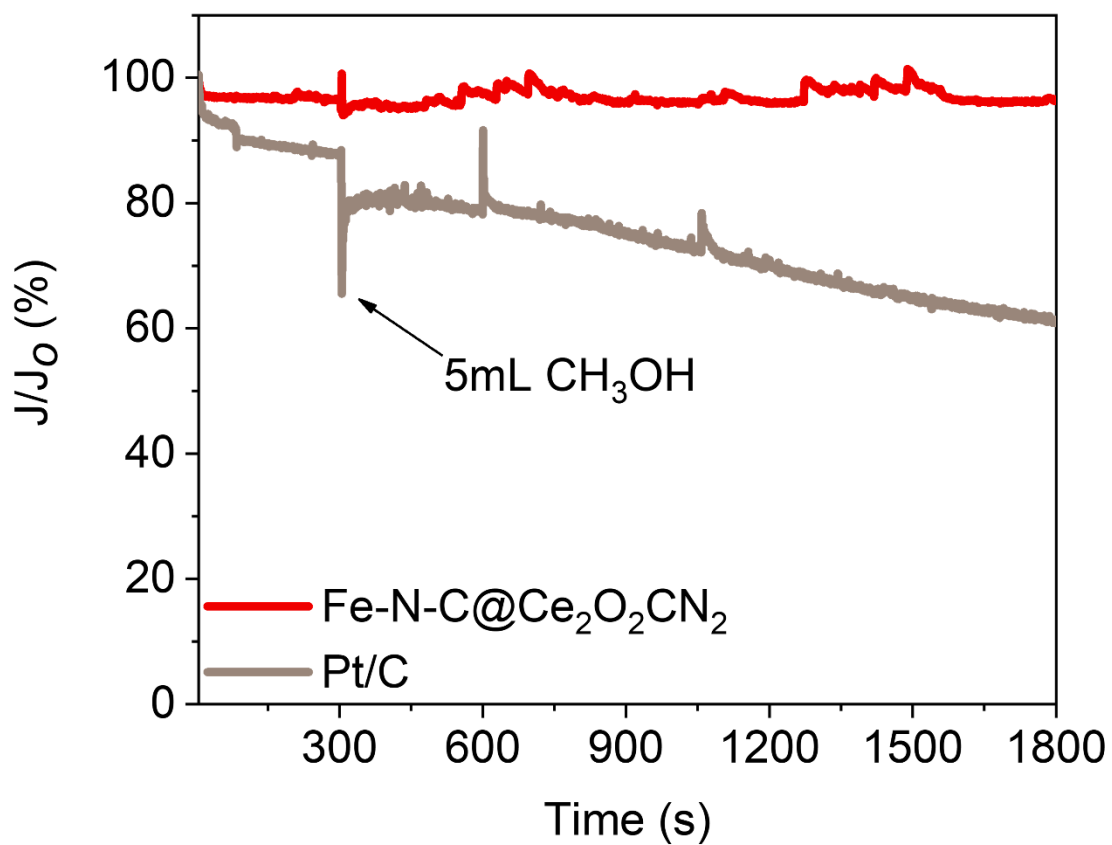

**Fig. S12.** Chronoamperometric responses of Pt/C at 0.5 V after injecting 5 ml methanol into 180 ml 0.1 M KOH.

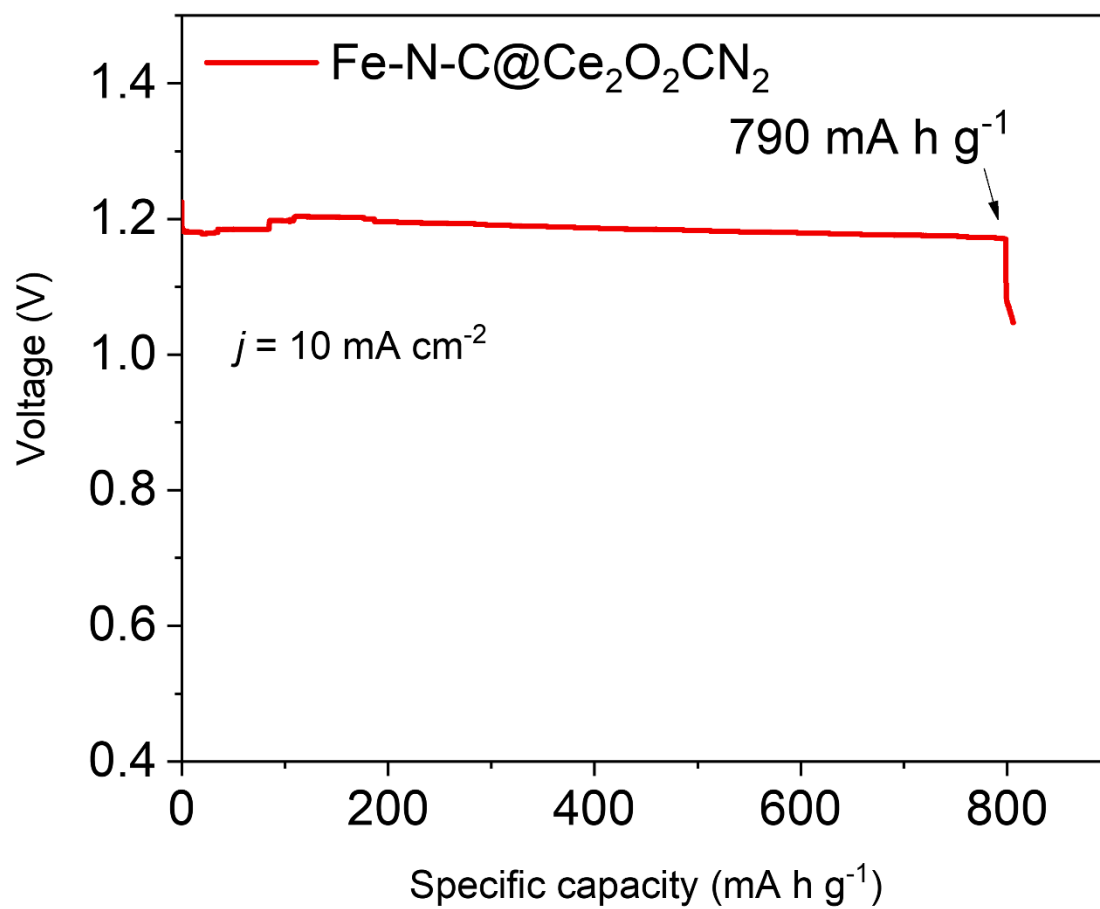

**Fig. S13.** Specific capacity of Fe-N-C@Ce<sub>2</sub>O<sub>2</sub>CN<sub>2</sub>.

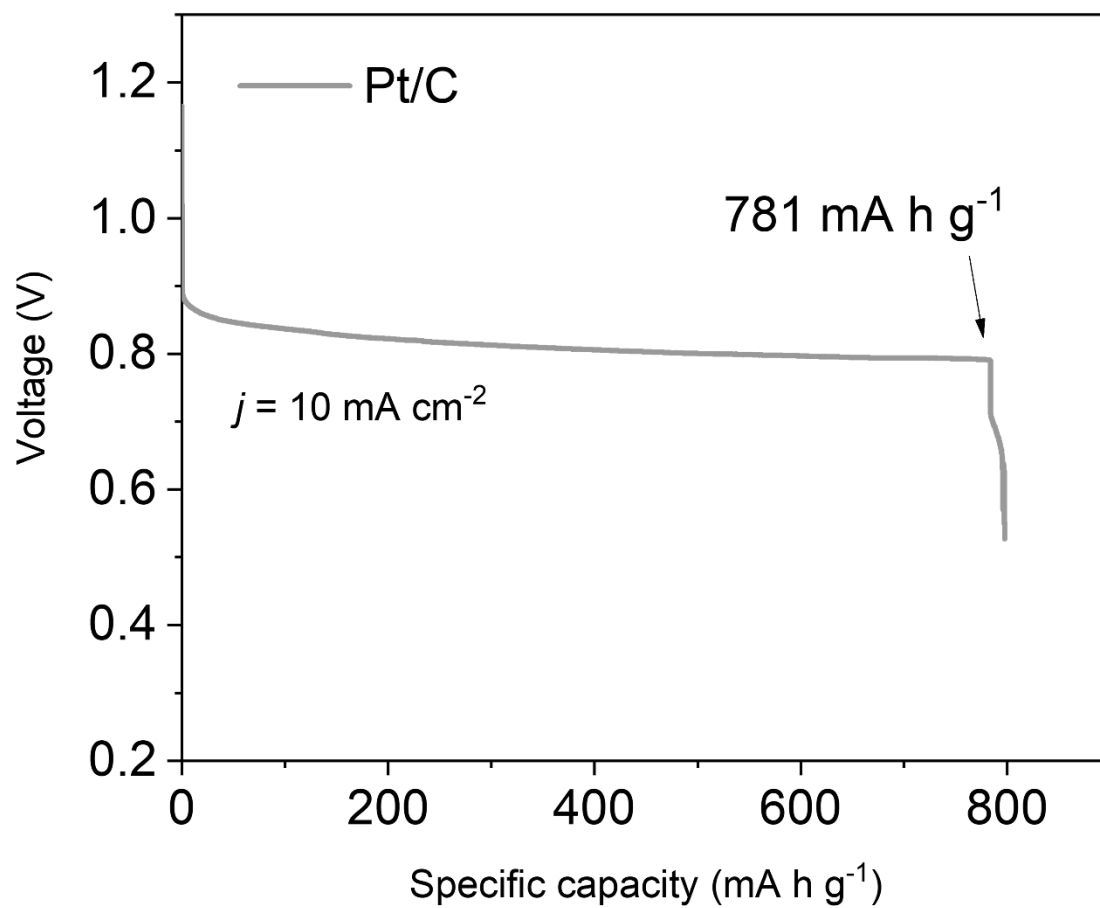

Fig. S14. Specific capacity of Pt/C.

**Table S1.** Comparison of ORR electrocatalysis performance of the as-prepared catalyst with reported catalysts.

| Samples                                               | $E_{\text{ONSET}}$ (V vs. RHE) | $E_{1/2}$ (V vs. RHE) | Reference |
|-------------------------------------------------------|--------------------------------|-----------------------|-----------|
| Fe-N-C@Ce <sub>2</sub> O <sub>2</sub> CN <sub>2</sub> | 0.951                          | 0.89                  | This work |
| Fe-N-C-2HT-1AL                                        | 0.92                           | 0.82                  | 1         |
| Fe-N-CC                                               | 0.94                           | 0.83                  | 2         |
| p-Fe-N-CNFs                                           | 0.91                           | 0.82                  | 3         |
| Fe-NC SAC                                             | 0.98                           | 0.90                  | 4         |
| Fe-N/P-C-700                                          | 0.941                          | 0.867                 | 5         |
| Fe <sub>2</sub> -Z8-C                                 | 0.985                          | 0.871                 | 6         |
| CNT@f-FeNC170                                         | 0.97                           | 0.84                  | 7         |
| Fe-N-C/MXene                                          | 0.92                           | 0.84                  | 8         |

**Table S2.** Comparison of ZABs performance of the as-prepared catalyst with reported catalysts.

| Samples                                               | OCP (V) | P <sub>max</sub> (mV/cm <sup>2</sup> ) | Reference |
|-------------------------------------------------------|---------|----------------------------------------|-----------|
| Fe-N-C@Ce <sub>2</sub> O <sub>2</sub> CN <sub>2</sub> | 1.43    | 120                                    | This work |
| FeCo NPs-N-CNTs                                       | 1.51    | 116                                    | 9         |
| CoN <sub>4</sub> /NG                                  | 1.51    | 115                                    | 10        |
| Co <sub>3</sub> FeS <sub>1.5</sub> (OH) <sub>6</sub>  | -       | 113.1                                  | 11        |
| Fe-N/C-1/30                                           | 1.525   | 121.8                                  | 12        |
| CoNi-SAs/NC                                           | 1.45    | 101.4                                  | 13        |
| Pd/FeCo                                               | 1.42    | 117                                    | 14        |
| FeCoMoS@NG                                            | 1.44    | 118                                    | 15        |
| Fe-2-WNPC-NCNTs                                       | 1.43    | 101.3                                  | 16        |

## References

1. N. R. Sahraie, U. I. Kramm, J. Steinberg, Y. Zhang, A. Thomas, T. Reier, J.-P. Paraknowitsch and P. Strasser, *Nature Communications*, 2015, **6**, 8618.
2. G. A. Ferrero, K. Preuss, A. Marinovic, A. B. Jorge, N. Mansor, D. J. L. Brett, A. B. Fuertes, M. Sevilla and M.-M. Titirici, *ACS Nano*, 2016, **10**, 5922-5932.
3. B.-C. Hu, Z.-Y. Wu, S.-Q. Chu, H.-W. Zhu, H.-W. Liang, J. Zhang and S.-H. Yu, *Energy & Environmental Science*, 2018, **11**, 2208-2215.
4. L. Zhao, Y. Zhang, L.-B. Huang, X.-Z. Liu, Q.-H. Zhang, C. He, Z.-Y. Wu, L.-J. Zhang, J. Wu, W. Yang, L. Gu, J.-S. Hu and L.-J. Wan, *Nature Communications*, 2019, **10**, 1278.
5. K. Yuan, D. Lützenkirchen-Hecht, L. Li, L. Shuai, Y. Li, R. Cao, M. Qiu, X. Zhuang, M. K. H. Leung, Y. Chen and U. Scherf, *Journal of the American Chemical Society*, 2020, **142**, 2404-2412.
6. Q. Liu, X. Liu, L. Zheng and J. Shui, *Angewandte Chemie International Edition*, 2018, **57**, 1204-1208.
7. G. Zhang, Y. Jia, C. Zhang, X. Xiong, K. Sun, R. Chen, W. Chen, Y. Kuang, L. Zheng, H. Tang, W. Liu, J. Liu, X. Sun, W.-F. Lin and H. Dai, *Energy & Environmental Science*, 2019, **12**, 1317-1325.
8. L. L. Jiang, J. J. Duan, J. W. Zhu, S. Chen and M. Antonietti, *Acs Nano*, 2020, **14**, 2436-2444.
9. T. Zhang, J. Bian, Y. Zhu and C. Sun, *Small*, 2021, **17**, 2103737.
10. L. Yang, L. Shi, D. Wang, Y. Lv and D. Cao, *Nano Energy*, 2018, **50**, 691-698.
11. H.-F. Wang, C. Tang, B. Wang, B.-Q. Li and Q. Zhang, *Advanced Materials*, 2017, **29**, 1702327.
12. W. Wei, X. Shi, P. Gao, S. Wang, W. Hu, X. Zhao, Y. Ni, X. Xu, Y. Xu, W. Yan, H. Ji and M. Cao, *Nano Energy*, 2018, **52**, 29-37.
13. X. Han, X. Ling, D. Yu, D. Xie, L. Li, S. Peng, C. Zhong, N. Zhao, Y. Deng and W. Hu, *Advanced Materials*, 2019, **31**, 1905622.
14. F. Pan, Z. Li, Z. Yang, Q. Ma, M. Wang, H. Wang, M. Olszta, G. Wang, Z. Feng, Y. Du and Y. Yang, *Advanced Energy Materials*, 2021, **11**, 2002204.
15. S. Ramakrishnan, J. Balamurugan, M. Vinothkannan, A. R. Kim, S. Sengodan and D. J. Yoo, *Applied Catalysis B: Environmental*, 2020, **279**, 119381.
16. Z. Liu, Y. Zhu, K. Xiao, Y. Xu, Y. Peng, J. Liu and X. Chen, *ACS Applied Materials & Interfaces*, 2021, **13**, 24710-24722.
